# Supplementary material for: Genetic Suppression of Basement Membrane Defects in Caenorhabditis elegans by Gain of Function in Extracellular Matrix and Cell-Matrix Attachment Genes
Source: PubMed Central journal article supplement (PMC5887144; doi:10.1534/genetics.118.300731), 2018-02-12

SUPPLEMENTAL FIGURE LEGENDS

**Figure S1** Evidence for gain of function nature of suppressors. (A) RNAi of *emb-9*, which is aphenotypic in a wild type background, abrogates the suppression of both *emb-9(ju1197)* and *let-2(ju1166)* type IV collagen suppressors. (B) *let-2(ju1166)* heterozygotes are genetically recessive for suppression of *pxn-2*; only the expected 25% of progeny predicted to be homozygous are viable. (C) Heterozygous *let-805(ju1123)* C1424R is a semi-dominant suppressor of *pxn-2(tm3464)*. (D) RNAi for *let-805* causes wild type worms to become sick and completely eliminates the *let-805(ju1123)* suppression of *pxn-2(tm3464)*. (E) GFP RNAi targeting GFP in the *let-805::GFP-3xFlag* has no effect in *let-805(ju1123)::GFP* background, but abrogates the ability of *let-805(ju1123)::GFP* to suppress *pxn-2(tm3464)*. (F) Heterozygous *unc-52(ju1168)* C402Y is a semi-dominant suppressor of *pxn-2(tm3464)*.

**Figure S2** (A) Alignment of 36 predicted FNIII repeats in LET-805. The original analysis of LET-805 structure suggested it contains at least 32 FNIII repeats. Reanalysis of the LET-805 extracellular domain using new tools (SMART, Pfam, ProSite) indicated an additional 4 predicted FNIII repeats as well as those previously identified. The new repeats are numbered 4, 6, 7, and 36 in this alignment. Unique sequences near the suppressor mutation clusters are underlined in red. (B) Alignment of *C. elegans* LET-805 FNIII repeats 9, 10, 14, and 15 with human sidekick-1 isoform 1 (NP\_689957). Residues mutated in suppressor alleles highlighted in red. (C) Alignment of *C. elegans* LET-805 FNIII repeats 9, 10, 14, and 15 with the orthologous sequences in other nematodes (*C. briggsae*, *C. remanei*, and *P. pacificus*). Residues mutated in suppressor alleles are highlighted in yellow.

**Figure S3** Predicted structures of the LET-805 FNIII repeats affected by suppressor alleles. (A) Expsy modeled electrostatic plot for LET-805 FNIII repeats 8-12, including residues R970, V1052, and R1076 (two 3-D orientations). (B) Expsy modeled electrostatic plot for LET-805 FNIII repeats 12-16, including residues P1422, C1424, R1443, G1541, E1547, A1552, G1578, R1584, and S1594 (two 3-D orientations). (C) Additional examples of structural models for the LET-805 FNIII repeats for comparison, a protein region not containing any suppressor residues was modeled.

**Figure S4** *let-805* gain of function alleles do not suppress epidermal attachment defects due to loss of function in intracellular cytoskeletal components, including mutations in *vab-10a* spectraplakin, *ifb-1*/intermediate filament B1, *vab-19* Kank, and the *hecd-1* Ubiquitin Ligase.

**Figure S5** LET-805::GFP localization is severely disrupted in *spon-1* and *pxn-2* loss of function embryos. The suppressor *let-805(ju1123)* restores LET-805::GFP hemidesmosome localization to wild-type-like. Confocal images of late stage mutant embryos: (A) *spon-1(ju430); let-805::GFP(ju1448)*, (B) *spon-1(ju430); let-805(ju1123)::GFP(ju1449)*, (C) *let-805::GFP(ju1448); pxn-2(ju358)*, (D) *let-805(ju1123)::GFP(ju1449); pxn-2(ju358)*, (E) *let-805(ju1123)::GFP(ju1449); pxn-2(tm3464)*.

#### SUPPLEMENTAL TABLES

**Table S1** Strains, genotypes, and lethality quantitation

**Table S2** RNAi

**Table S3** Primers



Supplemental Material for Gotenstein et al.

|                         |                                                     |         |      |         |     |     |     |       |      |       |     |
|-------------------------|-----------------------------------------------------|---------|------|---------|-----|-----|-----|-------|------|-------|-----|
| CZ4733                  | <i>spon-1(ju430) II</i>                             | 53%     | 245  | 45%     | 206 | 2%  | 10  | 0%    | 0    | 461   | 20C |
| CZ22389                 | <i>spon-1(ju430) II; emb-9(b189) III</i>            | 71%     | 575  | 25%     | 200 | 4%  | 33  | 0%    | 0    | 808   | 20C |
| CZ24150                 | <i>spon-1(ju430) II; let-2(b246) X</i>              | 85%     | 1078 | 13%     | 169 | 1%  | 18  | 0%    | 0    | 1265  | 20C |
| CZ20580                 | <i>spon-1(ju430) II; let-2(ju1166) X</i>            | 2%      | 11   | 9%      | 60  | 46% | 299 | 43%   | 278  | 648   | 20C |
| CZ20587                 | <i>spon-1(ju430) II; let-2(ju1180) X</i>            | 23%     | 78   | 8%      | 26  | 30% | 101 | 38%   | 128  | 333   | 20C |
| CZ22017                 | <i>spon-1(ju430) II; emb-9(ju1197) III</i>          | 33%     | 160  | 4%      | 20  | 20% | 99  | 42%   | 205  | 484   | 20C |
| CZ16462                 | <i>pxn-2(ju430) X; let-2 gDNA(juEx3911)</i>         | 48%     | 58   | 43%     | 52  | 8%  | 10  | 0%    | 0    | 120   | 20C |
| CZ25085                 | <i>pxn-2(ju430) X; emb-9 gDNA(juEx4358)</i>         | 70%     | 317  | 17%     | 76  | 14% | 62  | 0%    | 1    | 456   | 20C |
| CZ4734                  | <i>spon-1(e2623) II</i>                             | 2%      | 24   | 0%      | 4   | 16% | 213 | 81%   | 1060 | 1301  | 20C |
| CZ24213                 | <i>spon-1(e2623) II; emb-9(b189) III</i>            | 2%      | 8    | 0%      | 2   | 1%  | 5   | 96%   | 395  | 410   | 20C |
| CZ24212                 | <i>spon-1(e2623) II; let-2(b246) X</i>              | 1%      | 7    | 0%      | 0   | 8%  | 85  | 92%   | 997  | 1089  | 20C |
| CZ19652                 | <i>let-805(ju1123) III</i>                          | 0%      | 1    | 0%      | 0   | 0%  | 0   | 100%  | 1052 | 1053  | 20C |
| CZ19894                 | <i>let-805(ju1123); emb-9(b189) III</i>             | 2%      | 8    | 0%      | 0   | 0%  | 1   | 98%   | 413  | 422   | 20C |
| CZ24028                 | <i>let-805(ju1123) III; let-2(b246) X</i>           | 0%      | 6    | 0%      | 0   | 0%  | 3   | 99%   | 1441 | 1450  | 20C |
| CZ14391                 | <i>vab-10(ju958) I</i>                              | 0%      | 4    | 0%      | 0   | 0%  | 2   | 100%  | 1458 | 1464  | 20C |
| CZ20036                 | <i>vab-10(ju958) I; emb-9(b189) III</i>             | 0%      | 2    | 0%      | 2   | 0%  | 1   | 99%   | 456  | 461   | 20C |
| CZ5772                  | <i>pxn-2(ju358) X</i>                               | 24%     | 134  | 34%     | 194 | 36% | 206 | 6%    | 34   | 568   | 20C |
| CZ15380                 | <i>pxn-2(ju358) X; let-2 gDNA(juEx3911)</i>         | 14%     | 58   | 25%     | 103 | 45% | 186 | 15%   | 63   | 410   | 20C |
| CZ15960                 | <i>pxn-2(ju358) X; let-2 gDNA(juEx3913)</i>         | 16%     | 77   | 27%     | 130 | 49% | 233 | 8%    | 38   | 478   | 20C |
| CZ15959                 | <i>pxn-2(ju358) X; let-2 gDNA(juEx3914)</i>         | 16%     | 137  | 32%     | 272 | 47% | 390 | 5%    | 39   | 838   | 20C |
| CZ15961                 | <i>pxn-2(ju358) X; emb-9 gDNA(juEx4356)</i>         | 11%     | 36   | 31%     | 103 | 4%  | 14  | 54%   | 182  | 335   | 20C |
| CZ15968                 | <i>pxn-2(ju358) X; emb-9 gDNA(juEx4358)</i>         | 1%      | 3    | 8%      | 28  | 38% | 142 | 53%   | 198  | 371   | 20C |
| CZ16464                 | <i>pxn-2(ju358) X; emb-9 gDNA(juEx4359)</i>         | 8%      | 31   | 11%     | 44  | 40% | 153 | 41%   | 158  | 386   | 20C |
| CZ15962                 | <i>pxn-2(ju358) X; emb-9 + let-2 gDNA(juEx4362)</i> | 16%     | 14   | 31%     | 27  | 40% | 35  | 13%   | 11   | 87    | 20C |
| CZ15963                 | <i>pxn-2(ju358) X; emb-9 + let-2 gDNA(juEx4363)</i> | 22%     | 44   | 30%     | 60  | 32% | 64  | 15%   | 29   | 197   | 20C |
| CZ16465                 | <i>pxn-2(ju358) X; emb-9 + let-2 gDNA(juEx4365)</i> | 6%      | 30   | 23%     | 110 | 65% | 308 | 5%    | 24   | 472   | 20C |
| FX03464                 | <i>pxn-2(tm3464) X</i>                              | 27%     | 58   | 73%     | 159 | 0%  | 1   | 0%    | 0    | 218   | 20C |
| CZ22767                 | <i>emb-9(ju1197) III; pxn-2(tm3464) X</i>           | 8%      | 62   | 32%     | 241 | 9%  | 70  | 51%   | 391  | 764   | 20C |
| CZ24634                 | <i>let-2(ju1166):pxn-2(tm3464) X</i>                | 8%      | 44   | 15%     | 76  | 52% | 268 | 25%   | 132  | 520   | 20C |
| CZ21496                 | <i>let-2(ju1180):pxn-2(tm3464) X</i>                | 16%     | 46   | 18%     | 54  | 61% | 182 | 5%    | 14   | 296   | 20C |
| CZ11147<br>x<br>CZ24634 | <i>let-805(ju1166)/+ III; pxn-2(tm3464) X</i>       | 36%     | 38   | 42%     | 44  | 22% | 23  | 0%    | 0    | 105   | 20C |
|                         |                                                     | Emb/Let |      | Sterile |     | wt  |     | Males |      | Total |     |
| CH1179                  | <i>unc-36(e251) emb-9(g23cg46) III / qC1 III</i>    | 15%     | 130  | 24%     | 205 | 53% | 453 | 0%    | 0    | 853   | 20C |

Supplemental Material for Gotenstein et al.

|                         |                                                                                 |                            |     |                         |     |                             |     |                            |     |          |             |
|-------------------------|---------------------------------------------------------------------------------|----------------------------|-----|-------------------------|-----|-----------------------------|-----|----------------------------|-----|----------|-------------|
| CZ25327                 | <i>emb-9(ju1197) III males x unc-36(e251) emb-9(g23cg46) III / qC1 III herm</i> | 3%                         | 26  | 2%                      | 20  | 57%                         | 469 | 37%                        | 307 | 822      | 20C         |
| <b>Strain</b>           | <b>Genotype</b>                                                                 | <b>Embryonic Lethality</b> |     | <b>Larval Lethality</b> |     | <b>Adult Vab morphology</b> |     | <b>Adult wt morphology</b> |     | <b>n</b> | <b>Temp</b> |
| CZ4733                  | <i>spon-1(ju430) II</i>                                                         | 28%                        | 140 | 71%                     | 352 | 0%                          | 1   | 0%                         | 0   | 493      | 25C         |
| CZ20594                 | <i>spon-1(ju430) II; let-805(ju1184) III</i>                                    | 4%                         | 32  | 0%                      | 3   | 3%                          | 26  | 92%                        | 710 | 771      | 25C         |
| CZ23913                 | <i>spon-1(ju430) II; let-805(ju1386) III</i>                                    | 21%                        | 149 | 4%                      | 27  | 15%                         | 110 | 60%                        | 438 | 724      | 25C         |
| CZ20579                 | <i>spon-1(ju430) II; let-805(ju1165) III</i>                                    | 8%                         | 27  | 1%                      | 2   | 39%                         | 126 | 53%                        | 172 | 327      | 25C         |
| CZ20589                 | <i>spon-1(ju430) II; let-805(ju1177) III</i>                                    | 30%                        | 220 | 2%                      | 17  | 16%                         | 119 | 52%                        | 382 | 738      | 25C         |
| CZ19892                 | <i>spon-1(ju430) II; let-805(ju1123) III</i>                                    | 22%                        | 98  | 3%                      | 13  | 33%                         | 147 | 42%                        | 184 | 442      | 25C         |
| CZ20585                 | <i>spon-1(ju430) II; let-805(ju1173) III</i>                                    | 6%                         | 26  | 4%                      | 16  | 57%                         | 259 | 34%                        | 152 | 453      | 25C         |
| CZ19891                 | <i>spon-1(ju430) II; let-805(ju1122) III</i>                                    | 36%                        | 108 | 2%                      | 7   | 32%                         | 95  | 30%                        | 89  | 299      | 25C         |
| CZ20590                 | <i>spon-1(ju430) II; let-805(ju1175) III</i>                                    | 38%                        | 294 | 7%                      | 53  | 28%                         | 216 | 27%                        | 211 | 774      | 25C         |
| CZ20599                 | <i>spon-1(ju430) II; let-805(ju1198) III</i>                                    | 18%                        | 151 | 20%                     | 165 | 35%                         | 299 | 27%                        | 230 | 845      | 25C         |
| CZ20581                 | <i>spon-1(ju430) II; let-805(ju1167) III</i>                                    | 23%                        | 104 | 10%                     | 46  | 44%                         | 196 | 22%                        | 99  | 445      | 25C         |
| CZ20584                 | <i>spon-1(ju430) II; let-805(ju1170) III</i>                                    | 27%                        | 124 | 10%                     | 46  | 42%                         | 192 | 22%                        | 100 | 462      | 25C         |
| CZ20597                 | <i>spon-1(ju430) II; let-805(ju1187) III</i>                                    | 10%                        | 73  | 19%                     | 145 | 64%                         | 480 | 7%                         | 53  | 751      | 25C         |
| CZ22015                 | <i>spon-1(ju430) II; let-805(ju1190) III</i>                                    | 14%                        | 68  | 33%                     | 165 | 46%                         | 230 | 6%                         | 32  | 495      | 25C         |
| <b>Strain</b>           | <b>Genotype</b>                                                                 | <b>Embryonic Lethality</b> |     | <b>Larval Lethality</b> |     | <b>Adult Vab morphology</b> |     | <b>Adult wt morphology</b> |     | <b>n</b> | <b>Temp</b> |
| FX03464                 | <i>pxn-2(tm3464) X</i>                                                          | 27%                        | 58  | 73%                     | 159 | 0%                          | 1   | 0%                         | 0   | 218      | 20C         |
| CZ18265                 | <i>let-805(ju1123) III; pxn-2(tm3464) X</i>                                     | 6%                         | 31  | 1%                      | 7   | 32%                         | 177 | 61%                        | 337 | 552      | 20C         |
| CZ23912                 | <i>let-805(ju1386) III; pxn-2(tm3464) X</i>                                     | 1%                         | 7   | 0%                      | 2   | 46%                         | 252 | 52%                        | 281 | 542      | 20C         |
| CZ18264                 | <i>let-805(ju1122) III; pxn-2(tm3464) X</i>                                     | 5%                         | 25  | 1%                      | 5   | 46%                         | 230 | 48%                        | 242 | 502      | 20C         |
| CZ20991                 | <i>let-805(ju1165) III; pxn-2(tm3464) X</i>                                     | 3%                         | 26  | 1%                      | 11  | 61%                         | 463 | 35%                        | 265 | 765      | 20C         |
| CZ21498                 | <i>let-805(ju1184) III; pxn-2(tm3464) X</i>                                     | 27%                        | 172 | 6%                      | 38  | 53%                         | 341 | 14%                        | 93  | 644      | 20C         |
| CZ20988                 | <i>let-805(ju1170) III; pxn-2(tm3464) X</i>                                     | 14%                        | 101 | 22%                     | 155 | 50%                         | 351 | 14%                        | 100 | 707      | 20C         |
| CZ22296                 | <i>let-805(ju1187) III; pxn-2(tm3464) X</i>                                     | 2%                         | 5   | 1%                      | 2   | 90%                         | 252 | 8%                         | 21  | 280      | 20C         |
| CZ20990                 | <i>let-805(ju1173) III; pxn-2(tm3464) X</i>                                     | 22%                        | 101 | 39%                     | 175 | 35%                         | 157 | 4%                         | 19  | 452      | 20C         |
| CZ11147<br>x<br>CZ18265 | <i>let-805(ju1123)/+ III; pxn-2(tm3464) X</i>                                   | 23%                        | 86  | 16%                     | 59  | 54%                         | 203 | 7%                         | 27  | 375      | 20C         |
| <b>Strain</b>           | <b>Genotype</b>                                                                 | <b>Embryonic Lethality</b> |     | <b>Larval Lethality</b> |     | <b>Adult Vab morphology</b> |     | <b>Adult wt morphology</b> |     | <b>n</b> | <b>Temp</b> |





Supplemental Material for Gotenstein et al.

**Whole Genome Sequenced strains**

| <b>Strain</b> | <b>Genotype</b>                                 | <b>Notes</b>           |
|---------------|-------------------------------------------------|------------------------|
| CZ13800       | <i>pxn-2(ju358) X</i>                           | WGS version of CZ5772  |
| CZ13801       | <i>vab-10(ju958) I ; pxn-2(ju358) X</i>         | 1x outcrossed to N2    |
| CZ13802       | <i>vab-10(ju958) I ; pxn-2(tm3464) X</i>        | WGS version of CZ12415 |
| CZ18264       | <i>let-805(ju1122) III ; pxn-2(tm3464) X</i>    | 2x outcrossed          |
| CZ18265       | <i>let-805(ju1123) III ; pxn-2(tm3464) X</i>    | 2x outcrossed          |
| CZ20579       | <i>spon-1(ju430ts) II ; let-805(ju1165) III</i> | 1x outcrossed          |
| CZ20580       | <i>spon-1(ju430ts) II ; let-2(ju1166) X</i>     | 1x outcrossed          |
| CZ20581       | <i>spon-1(ju430ts) II ; let-805(ju1167) III</i> | 1x outcrossed          |
| CZ20988       | <i>let-805(ju1170) III ; pxn-2(tm3464) X</i>    |                        |
| CZ20990       | <i>let-805(ju1173) III ; pxn-2(tm3464) X</i>    |                        |
| CZ21257       | <i>unc-52(ju1168) II ; pxn-2(tm3464) X</i>      |                        |
| CZ22017       | <i>spon-1(ju430ts) II ; emb-9(ju1197) III</i>   | 1x outcrossed          |
| CZ21494       | <i>unc-52(ju1174) II ; pxn-2(tm3464) X</i>      |                        |
| CZ21496       | <i>pxn-2(tm3464) X ; let-2(ju1180) X</i>        |                        |
| CZ22296       | <i>let-805(ju1187) III ; pxn-2(tm3464) X</i>    |                        |
| CZ22297       | <i>unc-52(ju1188) II ; pxn-2(tm3464) X</i>      |                        |
| CZ23560       | <i>spon-1(ju430ts) II ; unc-52(ju1172) II</i>   | 1x outcrossed          |



Supplemental Table S2: RNAi

| Worm Strain | Genotype                                                                      | RNAi         | Embryonic Lethality |     | Larval Lethality |    | Vab Adults |     | WT Adults |     | n   |
|-------------|-------------------------------------------------------------------------------|--------------|---------------------|-----|------------------|----|------------|-----|-----------|-----|-----|
|             |                                                                               |              | %                   | n   | %                | n  | %          | n   | %         | n   |     |
| N2          | Wild-type                                                                     | Empty vector | 0%                  | 0   | 0%               | 0  | 0%         | 0   | 100%      | 473 | 719 |
|             |                                                                               | emb-9        | 0%                  | 0   | 0%               | 0  | 0%         | 0   | 100%      | 394 | 616 |
| CZ11147     | <i>pxn-2(tm3464) X</i>                                                        | Empty vector | 59%                 | 102 | 40%              | 68 | 1%         | 2   | 0%        | 0   | 216 |
|             |                                                                               | emb-9        | 39%                 | 56  | 53%              | 76 | 8%         | 11  | 0%        | 0   | 158 |
| CZ22767     | <i>emb-9(ju1197) III; pxn-2(tm3464) X</i>                                     | Empty vector | 2%                  | 2   | 6%               | 6  | 33%        | 35  | 59%       | 62  | 765 |
|             |                                                                               | emb-9        | 15%                 | 13  | 7%               | 6  | 33%        | 28  | 44%       | 37  | 678 |
| CZ24634     | <i>emb-9(ju1197) III; pxn-2(tm3464) X</i>                                     | Empty vector | 0%                  | 0   | 1%               | 1  | 24%        | 18  | 75%       | 56  | 203 |
|             |                                                                               | emb-9        | 11%                 | 6   | 11%              | 6  | 24%        | 13  | 55%       | 30  | 152 |
| Worm Strain | Genotype                                                                      | RNAi         | Embryonic Lethality |     | Larval Lethality |    | Vab Adults |     | WT Adults |     | n   |
| N2          | Wild-type                                                                     | Empty vector | 0%                  | 0   | 0%               | 0  | 0%         | 0   | 100%      | 473 | 719 |
|             |                                                                               | let-805      | 0%                  | 1   | 1%               | 6  | 98%        | 556 | 1%        | 7   | 616 |
| CZ11147     | <i>pxn-2(tm3464) X</i>                                                        | Empty vector | 59%                 | 102 | 40%              | 68 | 1%         | 2   | 0%        | 0   | 216 |
|             |                                                                               | let-805      | 90%                 | 126 | 7%               | 10 | 3%         | 4   | 0%        | 0   | 158 |
| CZ19892     | <i>let-805(ju1123) III ; pxn-2(tm3464) X</i>                                  | Empty vector | 0%                  | 0   | 0%               | 1  | 21%        | 45  | 79%       | 169 | 765 |
|             |                                                                               | let-805      | 78%                 | 131 | 22%              | 36 | 0%         | 0   | 0%        | 0   | 678 |
| Worm Strain | Genotype                                                                      | RNAi         | Embryonic Lethality |     | Larval Lethality |    | Vab Adults |     | WT Adults |     | n   |
| CZ23946     | <i>let-805(ju1123) let-805::GFP::3xFlag(ju1449) III</i>                       | Empty vector | 0%                  | 0   | 0%               | 0  | 0%         | 0   | 100%      | 677 | 719 |
|             |                                                                               | GFP          | 1%                  | 3   | 0%               | 0  | 0%         | 0   | 99%       | 558 | 616 |
| CZ11147     | <i>pxn-2(tm3464) X</i>                                                        | Empty vector | 59%                 | 102 | 40%              | 68 | 1%         | 2   | 0%        | 0   | 216 |
|             |                                                                               | GFP          | 63%                 | 109 | 35%              | 61 | 2%         | 3   | 0%        | 0   | 158 |
| CZ19892     | <i>let-805(ju1123) III ; pxn-2(tm3464) X</i>                                  | Empty vector | 0%                  | 0   | 0%               | 1  | 21%        | 45  | 79%       | 169 | 765 |
|             |                                                                               | GFP          | 0%                  | 0   | 0%               | 0  | 17%        | 15  | 83%       | 71  | 678 |
| CZ24114     | <i>let-805(ju1123) III let-805::GFP::3xFlag(ju1449) III ; pxn-2(tm3464) X</i> | Empty vector | 0%                  | 0   | 0%               | 0  | 11%        | 14  | 89%       | 114 | 203 |
|             |                                                                               | GFP          | 2%                  | 3   | 4%               | 7  | 41%        | 70  | 53%       | 90  | 152 |

**Supplemental Table S3: Primers**

| Primer # | Name                      | Sequence                                                  | Purpose                                                                           |
|----------|---------------------------|-----------------------------------------------------------|-----------------------------------------------------------------------------------|
| AC1744   | ju358 D1                  | GAAAAGTTACGACGGCAATC                                      | genotyping tm3464                                                                 |
| AC1752   | PXN-2 P4                  | GCAGTGAGTGTGAGATCGTG                                      |                                                                                   |
| AC2047   | PXN-2 P13                 | GAAAGTTGCGAAGATCACTGC                                     |                                                                                   |
| AC1642   | ju430 d1                  | GTGGATGATGGTGGTAAAAGAGT                                   | genotyping ju430                                                                  |
| AC1643   | ju430 u1                  | TCGCCCCTGATACCCATTTAC                                     |                                                                                   |
| AC1736   | emb-9 b189 For            | ACAAAACCTTTCAGGGTTTCCC                                    | genotyping b189 and ju1197                                                        |
| AC1737   | emb-9 b189 Rev            | CCCTTTTCTCCTTTCACTCCTG                                    |                                                                                   |
| AC3781   | let-2 For ju1166          | CCCAGGACAAAAGCATCCCAG                                     | genotyping ju1166 and ju1180                                                      |
| AC3782   | let-2 Rev ju1166          | TCCTGGTCTAAGGGTTAGCTG                                     |                                                                                   |
| AC3623   | vab-10 ju958 us           | GCATCTCACCCTCTGGCAG                                       | genotyping ju958, ju1299, and ju1300                                              |
| AC3624   | vab-10 ju958 ds           | TGATTGACACGCTGGGTGG                                       |                                                                                   |
| AC3299   | let-805 For               | TTGCGACAACAACCAGGAGG                                      | genotyping ju1123, ju1122, ju1165, ju1167, ju1175, ju1177, ju1184, ju1187, ju1198 |
| AC3300   | let-805 Rev               | CCGCAGATTCGGTGACCTTAG                                     |                                                                                   |
| AC3661   | let-805 p11 For           | TTTTACAGCTCGAATGTCC                                       | genotyping ju1170, ju1173, ju1190                                                 |
| AC3674   | let-805 p28 Rev           | TTGACTGGGATTGTGTTG                                        |                                                                                   |
| AC3763   | unc-52 ju1174 For         | ACCACTTCCATCTTCTGCTC                                      | genotyping ju1174                                                                 |
| AC3764   | unc-52 ju1174 Rev         | ATAAGGCTCAGGATGGGTTC                                      |                                                                                   |
| AC3765   | unc-52 ju1168 For         | GACTGCATCAAACCGTTGAG                                      | genotyping ju1168                                                                 |
| AC3766   | unc-52 ju1168 Rev         | CTTACACAAGCGGCGTCTG                                       |                                                                                   |
| AC3997   | unc-52 ju1172 For         | ACTTCAATCGGAGCCAGTGC                                      | genotyping ju1172                                                                 |
| AC3998   | unc-52 ju1172 Rev         | CTGTTAGTGGTTGGGTCCGTG                                     |                                                                                   |
| AC3961   | let-805 C-term 5' arm For | ACGTTGTAAAACGACGGCCAGTCGCCGGCACTCTGCAACCCAA<br>CGTAATTC   | <i>let-805</i> C-terminal GFP Crispr knock-in                                     |
| AC3962   | let-805 C-term 5' arm Rev | CATCGATGCTCCTGAGGCTCCCGATGCTCCACGGGATGAGTGCT<br>CTTCTTTG  |                                                                                   |
| AC3963   | let-805 C-term 3' arm For | CGTGATTACAAGGATGACGATGACAAGAGATAATCTCTGGAAA<br>TTTTCAACC  |                                                                                   |
| AC3964   | let-805 C-term 3' arm Rev | GGAAACAGCTATGACCATGTTATCGATTTCTCTGAGCACTGAAC<br>CCACTG    |                                                                                   |
| AC3965   | let-805 C-term sgRNA F    | GCACTCATCCCGTTAATCTCGTTTTAGAGCTAGAAATAGCAAGT<br>TAAAATAAG |                                                                                   |
| AC3966   | let-805 C-term sgRNA R    | GAGATTAACGGGATGAGTGCCAAGACATCTCGCAATAGGAG                 |                                                                                   |
| AC3858   | let-805 ju1123 sgRNA F    | CCATTGGTCTGAAGGCATGGGTTTTAGAGCTAGAAATAGCAAG               |                                                                                   |

Supplemental Material for Gotenstein et al.

|        |                        |                                                                                                                            |                                                                                                                        |
|--------|------------------------|----------------------------------------------------------------------------------------------------------------------------|------------------------------------------------------------------------------------------------------------------------|
|        |                        | TTAAAATAAG                                                                                                                 |                                                                                                                        |
| AC3859 | let-805 ju1123 sgRNA R | CCATGCCTTCAGACCAATGGCAAGACATCTCGCAATAGGAG                                                                                  |                                                                                                                        |
| AC3790 | ju1123 crispr oligo    | tacctccgaacagaggacattcgtccaactgatgtagtattcctggcaggeaccaccaCgcctcagac<br>caatggagaatcaccgagtacgagtacgaggaactgctggagatcgta   |                                                                                                                        |
| AC3724 | vab-10 ju958 sgRNA F   | TCAACGTGACGCTATCATGAGTTTTAGAGCTAGAAATAGCAAG<br>TTAAAATAAG                                                                  | attempt to knock in <i>ju958</i> D941N (G>A, in red) SNP, instead generating deletions <i>ju1299</i> and <i>ju1300</i> |
| AC3725 | vab-10 ju958 sgRNA R   | TCATGATAGCGTCACGTTGACAAGACATCTCGCAATAGGAG                                                                                  |                                                                                                                        |
| AC3746 | ju958 crispr oligo     | aggatgggatctcgacacgttcaactcgattgacctgatcaacgtgacgctatcatgaaggcactgaac<br>gatAatgctaacaactgctcagcgagctcgatccaatgatccattggcg |                                                                                                                        |

Figure S1

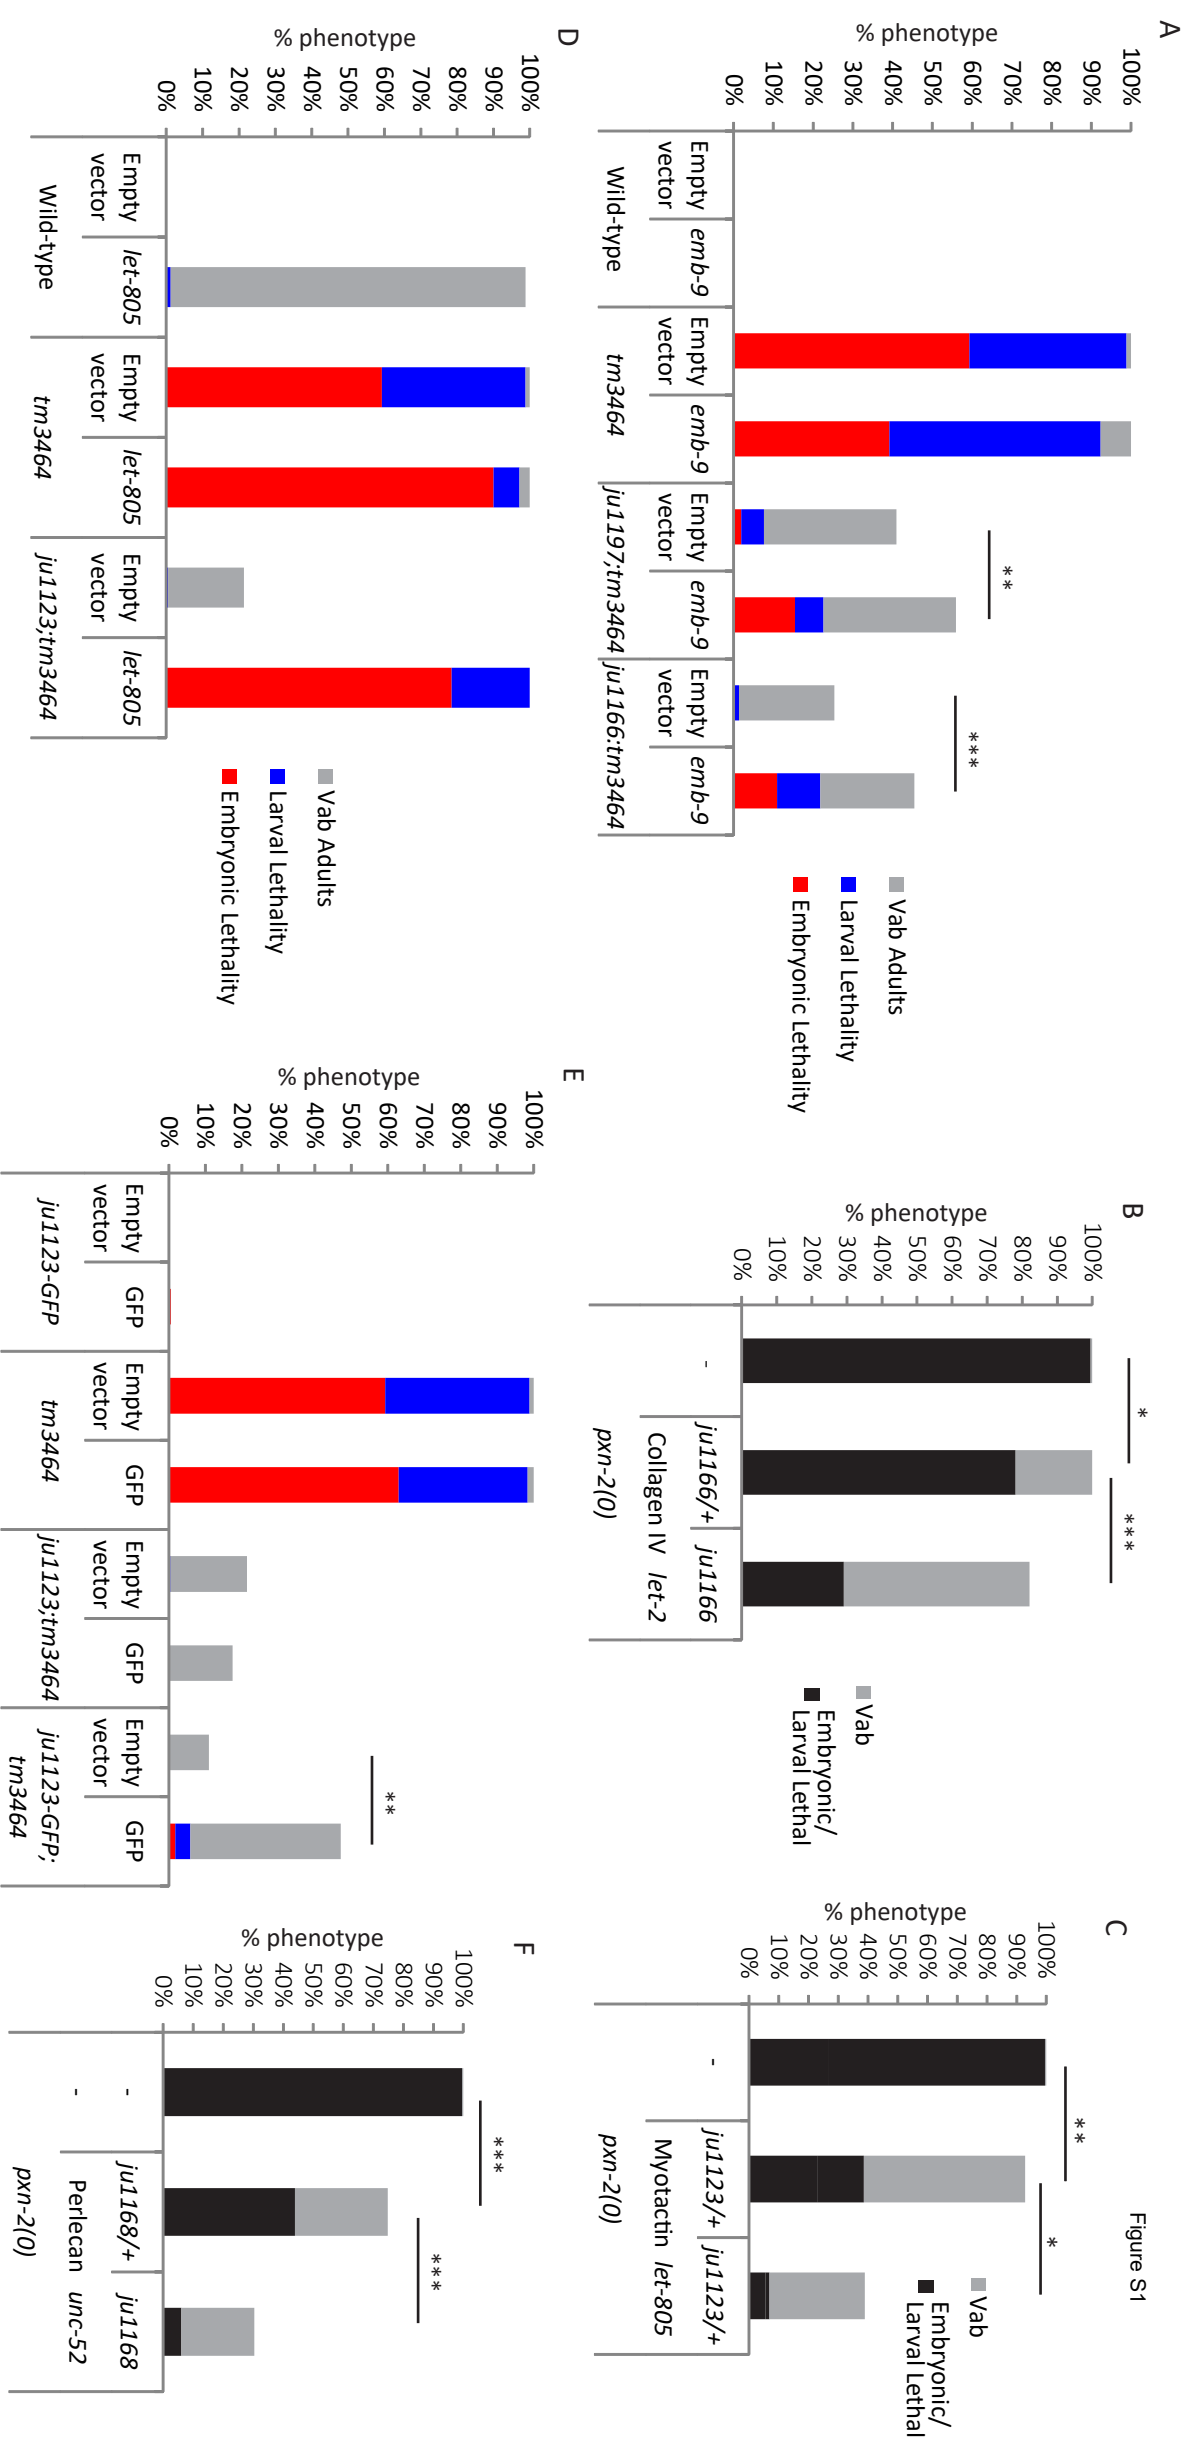



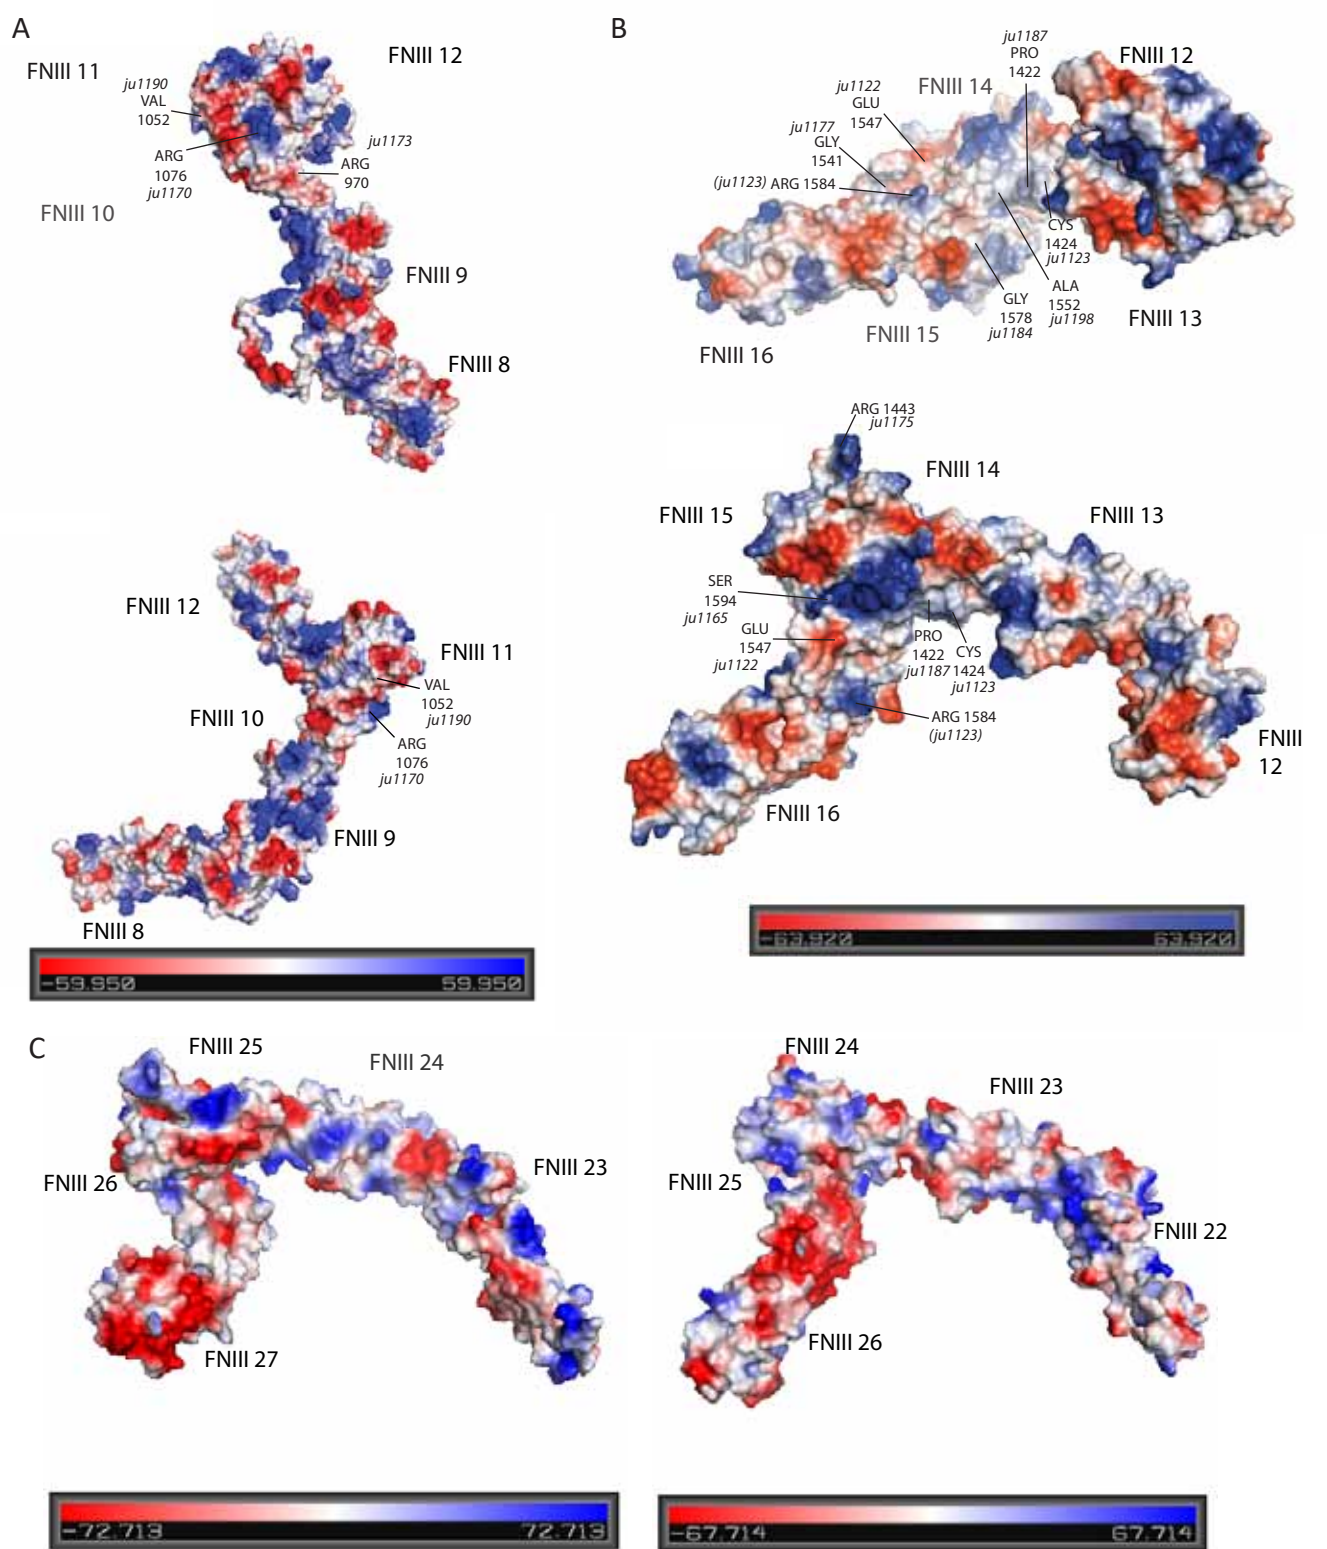

Figure S3

Figure S4

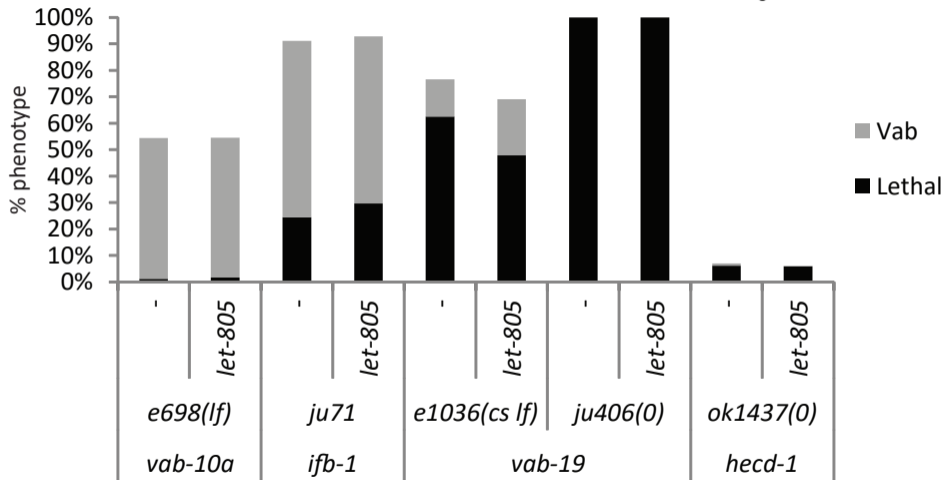

A *spon-1(ju430)*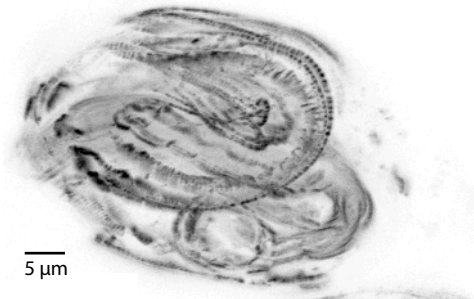B *spon-1(ju430);let-805(ju1123)*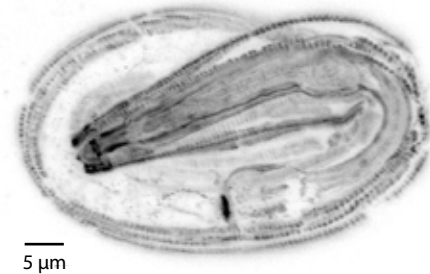C *pxn-2(ju358)*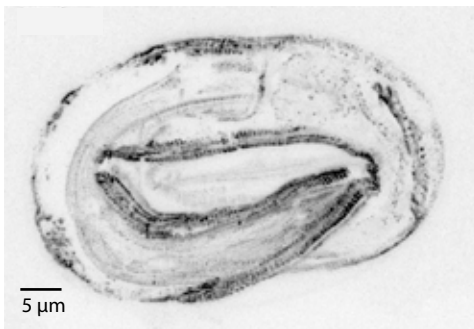D *let-805(ju1123);pxn-2(ju358)*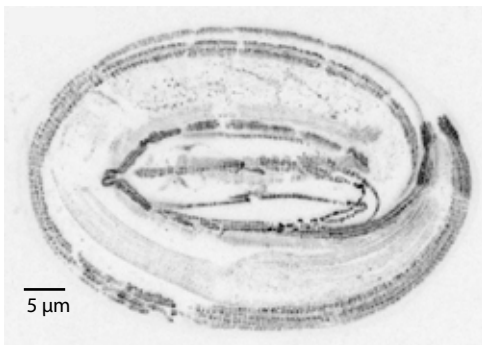E *let-805(ju1123);pxn-2(tm3464)*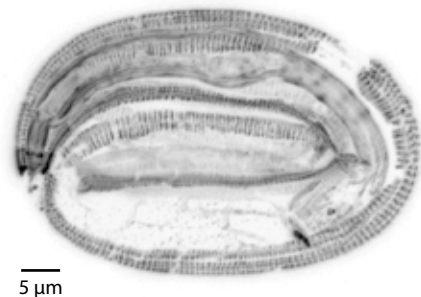

Supplement: 1499FileS1.pdf [file 1499FileS1.pdf]
